# Supplementary material for: Ecophysiological modeling of the climate imprint on photosynthesis and carbon allocation to the tree stem in the North American boreal forest
Source: Copernicus journal article supplement (doi:10.5194/bg-2017-51), 2017-02-23
Supplement: Supplementary file 1 [file bg-2017-51-supplement.zip]

Archive with 2 entries (2 files):
- Dataset-S01.csv
- Gennaretti_et_al_Supplements.pdf
