# Supplementary material for: Ecophysiological modeling of the climate imprint on photosynthesis and carbon allocation to the tree stem in the North American boreal forest
Source: Copernicus journal article supplement (doi:10.5194/bg-2017-51), 2017-02-23
Supplement: Supplementary file 1 [file bg-2017-51-supplement.zip › Dataset-S01.csv]

Supplementary Dataset S1 of the article "Ecophysiological modeling of the climate imprint on photosynthesis and carbon allocation to the tree stem in the North American boreal forest"
Submitted to Biogeosciences
Authors: Fabio Gennaretti (1), Guillermo Gea-Izquierdo (2), Etienne Boucher (3), Frank Berninger (4), Dominique Arseneault (5), Joel Guiot (1)
Author affiliations:
(1) CEREGE, Aix-Marseille University, CNRS, IRD, Aix en Provence, 13545, France
(2) Departamento de Sistemas y Recursos Forestales, CIFOR-INIA, Madrid, 28040, Spain
(3) D�partement de g�ographie, Universit� du Qu�bec � Montr�al, Montr�al, H3C3P8, Canada
(4) Department of Forest Sciences, University of Helsinki, Helsinki, 00014, Finland
(5) D�partement de biologie, chimie et g�ographie, Universit� du Qu�bec � Rimouski, Rimouski, G5L3A1, Canada
Corresponding author:
Fabio Gennaretti
Email: gennaretti@cerege.fr
Tel.: +33 442971532
This file contains the used ring with data from 46 black spruce trees (1950-2010 period). The time series are standardized using a site-specific Regional Curve Standardization (Gennaretti et al., 2014, PNAS).
Tree.ID	1950	1951	1952	1953	1954	1955	1956	1957	1958	1959	1960	1961	1962	1963	1964	1965	1966	1967	1968	1969	1970	1971	1972	1973	1974	1975	1976	1977	1978	1979	1980	1981	1982	1983	1984	1985	1986	1987	1988	1989	1990	1991	1992	1993	1994	1995	1996	1997	1998
L1_V2J	1.061221437	1.066689884	1.16410921	1.058914158	1.10118312	1.106458273	1.167696584	1.060715143	0.859003958	0.919868704	0.962177447	0.966771772	1.00943053	0.956849138	0.84643985	0.869816169	0.816212813	0.742916375	0.746722814	0.867269699	0.85193645	0.75817728	0.860214106	0.80526243	0.769710662	0.614923767	0.538686756	0.581703854	0.765221451	0.869589152	0.712435958	0.695872232	0.719822282	0.764344697	0.829683396	0.772199556	0.858737525	0.842372345	0.971568975	0.997386059	1.107440896	1.070890365	1.034039903	1.188500709	1.044968088	1.222610618	1.185972733	1.322858452	1.373896502
L1_V3J	0.991724544	0.87694134	1.160666793	0.925481216	0.869589152	0.974689504	1.080550461	0.943351836	0.764344697	0.911587161	0.957208928	0.879377007	0.987445289	0.929944209	0.89287293	1.023458678	1.113072952	0.970469996	0.826541687	0.937984933	0.857027978	0.92657451	1.018614249	1.089838423	0.920194019	0.85913932	0.797386619	0.891459615	0.919196013	1.128494348	0.907401822	0.912882893	0.987777116	0.94737253	0.859508542	0.864807388	0.893974311	0.92358588	0.977838943	0.935473997	0.916972687	0.922934863	0.803926539	0.935137551	1.017804214	0.870598606	0.824388183	1.039446845	0.993973294
L1_V01	1.106501585	0.940730221	1.04293616	0.822644023	0.821948513	0.914654253	0.969547615	1.161132901	1.042958961	0.936566669	0.883943173	0.984842202	1.101806954	1.092068455	0.951927922	0.794295234	0.574572082	0.350479803	0.151940293	0.312028131	0.413555705	0.362751794	0.372615684	0.507115399	0.39150111	0.432229671	0.425211448	0.53034133	0.604147683	0.76018514	0.638526059	0.796051216	0.655508189	0.747332519	0.738764175	0.746665652	0.73723922	0.864521216	0.872169536	0.723586006	0.782164741	0.788519405	0.900181905	1.083307696	0.983806291	1.204099082	1.300701336	1.541735954	1.351133562
L1_V11	0.812578282	0.717041079	0.858470748	0.690744027	0.648513651	0.764182558	0.940050633	0.868747089	0.810562256	0.735895061	0.750045847	0.763932435	0.977237976	0.961199134	0.89747201	0.863631852	0.701835941	0.744784568	0.594725305	0.717625684	0.711212948	0.671395523	0.696792416	0.971844115	0.998629173	1.143276901	1.289194673	1.453386821	1.447486159	1.492764598	1.312783722	1.095685929	0.998570925	0.952948142	1.047965178	1.0725658	0.972299257	0.924635226	1.074166292	0.953869663	1.104359914	1.055653186	1.097763438	1.121708741	0.99844547	0.985020296	1.045566592	0.97623527	0.981027872
L1_V14	0.642786706	0.56379466	0.691029465	0.408916304	0.408782845	0.538976583	0.573533836	0.620034731	0.544131277	0.568749233	0.593944778	0.712352772	0.646176089	0.50802835	0.85632532	0.694087379	0.650691243	0.557883388	0.587833672	0.744201085	0.777983691	0.647305289	0.630741856	0.744609827	0.677502501	0.676004715	0.795526397	0.823250996	1.179412715	1.239649392	1.023028252	0.81634693	0.903362782	0.877445163	1.168557188	1.085806033	1.162922096	0.988658689	1.140171439	0.976606735	1.083841624	1.069410903	1.069622401	1.522042589	1.162647988	1.336203635	1.240122905	1.367333004	1.268804542
L1_V16	0.459142167	0.272122462	0.366370177	0.378153608	0.489112402	0.652530264	0.773281294	0.604264522	0.630790694	0.598912264	0.662206522	0.564355735	0.538577919	0.482967783	0.469546503	0.463833608	0.476085916	0.546716025	0.708890059	0.815062899	0.841644804	0.617946403	0.535918602	0.655357773	0.604091911	0.727254406	0.631138573	0.791075853	0.636810316	0.61686626	0.978622229	1.184032323	1.334585775	1.03518001	0.995084915	0.930301606	1.36803342	1.10838368	1.194709955	1.043325067	1.54033769	1.017174016	0.978712414	1.04518326	0.901395946	1.116796338	1.269255111	1.384093347	1.377414266
L1_V17	1.342136684	1.164123014	1.318639263	1.147268435	1.212824805	1.036506893	1.172339796	1.063002621	0.927867196	0.934885408	1.088342247	1.036608407	1.170353919	1.119625143	0.904336727	1.068306278	1.068698304	0.991718113	1.071446171	1.060495638	0.982933863	1.066525968	1.056604336	1.129437492	0.730949586	0.900594566	0.960061117	1.24945887	1.255208895	1.464770072	1.339427101	0.973817319	0.975466248	0.855774261	1.02290654	1.038686594	1.023155287	0.975543333	1.021008765	0.844568672	1.080336345	0.997125148	1.041848541	1.168286734	1.000090166	1.06074135	0.921896337	1.149407166	1.160131598
L1_V19	1.180444134	0.969615793	1.161196257	0.953810788	1.091382823	1.036524378	1.326985549	1.321757583	1.088622711	1.254813086	0.991010172	1.062742436	1.114161977	1.089595748	1.030876904	0.768626346	0.693527884	0.628327002	0.434506382	0.529250821	0.401756681	0.331684897	0.344930238	0.358923907	0.287833377	0.253194382	0.406319432	0.525277618	0.58351726	0.708028288	0.588541435	0.546187944	0.676004715	0.608118932	0.674582958	0.592661571	0.578377996	0.550138984	0.647851658	0.591521941	0.634205431	0.576437194	0.648539834	0.868747089	0.780879517	0.885627053	1.006814853	1.068607853	1.100135212
L12V1J	1.25368672	1.031275062	1.203674604	1.13562438	0.983258161	1.055035837	1.232523303	1.444870083	1.138374005	1.256483694	1.213670245	1.191825948	1.191509268	1.224403438	1.06672945	1.053472438	0.914324989	1.083392394	1.069541749	1.183878635	1.311666925	1.156575742	1.273955789	1.501466084	1.416690675	1.159181513	1.452395083	1.203342402	1.175696387	1.210618483	1.055246933	1.166510645	1.163197229	1.172773479	1.182417033	1.403759403	1.335221366	1.265475849	1.329988282	1.245192766	1.489382229	1.293212955	1.051725562	1.285918491	1.253561813	1.249251476	1.186923078	1.094307517	1.147064839
L12V6Y	0.689877582	0.782020869	0.817294813	0.735484081	0.711541069	0.597499144	0.602044094	0.606621613	0.641852673	0.708482941	0.651714451	0.688087716	0.725024039	0.60326499	0.672212016	0.742240439	0.813355272	0.787026287	0.661035454	0.733206449	0.739305872	0.508744582	0.785899204	0.723949704	0.661147109	0.701845454	0.603047392	0.573447994	0.614447128	0.798840332	0.698100231	0.596091585	0.601982776	0.644566874	0.540385708	0.768342549	0.700939302	0.745165674	0.789901253	0.759375267	0.804708317	0.697368863	0.781399525	0.905039842	0.679915539	0.687097654	0.537250744	0.662357274	0.788752465
L12V02	1.1810329	1.052002239	1.083373637	0.830391774	0.771765897	0.801150384	0.808443429	0.79309295	0.66327212	0.692326926	0.90724976	0.985272327	0.958465051	1.049795661	0.915274646	0.874956047	0.894617675	0.987891904	1.008532348	1.054243349	1.188217623	0.970866208	1.093397707	1.089611819	1.266535188	0.951445589	1.16929441	0.993714317	0.895225648	0.821940943	0.937067425	0.821769593	0.800888453	0.765690849	0.673843236	0.848499495	0.812553758	0.761592184	0.825403248	0.817294813	0.94127446	0.830099495	0.761850208	0.933426554	0.849585143	1.05517052	0.909089913	0.978366466	1.111411328
L12V07	0.832536037	0.689299166	0.79869536	0.650990279	0.719786637	0.821509438	0.754443952	0.707612421	0.649051612	0.731818818	0.849087045	0.778873907	0.819673256	0.713847019	0.880090507	0.933867362	0.675404062	0.891810535	1.111519197	1.073524568	1.082659179	0.959293937	0.906758907	0.767662407	0.811260021	0.681495715	0.649804474	0.756351015	0.788191515	0.833282398	0.995273045	0.704079124	0.762493086	0.782078143	0.841892834	1.144511784	1.072557376	0.903722465	1.11759559	1.237684313	1.471594812	1.441131683	1.253561813	1.507424043	1.345991803	1.487957148	1.36755453	1.363612413	1.404313457
L12V08	0.662227505	0.399177692	0.658501438	0.554246156	0.652842308	0.786154973	0.829238822	0.725195782	0.597798762	0.775413144	0.86640485	0.710837844	0.883591648	0.889972033	0.809026643	0.743854	0.773717758	0.862727798	0.832536037	0.74001794	0.870469783	0.909993842	0.939530923	0.958860089	0.871755913	0.686088057	0.844496523	0.753723919	0.804903532	0.723182716	0.707374986	0.66856363	0.845856024	0.830350032	0.90724976	1.137147739	1.040878822	0.919286673	1.058747103	0.947245667	1.028171233	0.914482072	0.971543787	1.116367954	0.987877846	1.210618483	1.093397707	1.243409471	1.253617944
L12V11	1.117044558	1.008953512	1.105089738	0.786581571	0.838041166	0.968223958	1.010580315	1.030830744	1.028439929	1.163905872	1.266610592	1.277340427	1.264573342	1.085389022	1.130483332	1.091824906	1.258854652	1.416115927	1.205804675	1.054243349	1.075526498	0.958247667	1.233283878	1.307491826	1.266535188	1.00352274	0.959332436	0.742396361	0.868559241	0.902583653	0.774479484	0.685181473	0.814658328	0.848983813	1.079716845	1.398800812	1.068622951	1.120165193	1.331531009	1.240103676	1.264659341	1.245053987	1.165257365	1.385311725	1.031807791	1.009246315	1.094265579	1.196134475	1.205483241
L12V12	1.08057942	0.755673518	1.577544375	1.424219007	0.813356982	1.236809248	1.407857435	1.217168644	1.34465244	1.473611064	1.341495273	1.326656585	1.471310436	1.443831172	1.338978209	1.219755803	0.971359002	1.295233184	1.381025424	1.348540501	1.484536222	1.429793272	1.30111632	1.18971769	1.410411534	1.613917037	1.799586875	1.428678603	1.267960498	1.301351455	1.268830415	0.89025629	1.2127172	1.155360064	1.336550269	1.232917425	1.220241452	1.067051395	1.299893529	1.192169103	1.369604094	1.248452415	1.028171233	1.477290787	1.267452277	1.389716218	1.288387511	1.48822638	1.589357768
L12V15	1.461678148	1.313001756	1.558645596	1.43771143	1.464077481	1.370248886	1.396253086	1.453180299	1.402891689	1.476121916	1.534734939	1.451944344	1.511085502	1.506851285	1.3892311	1.318612439	1.54244829	1.637218026	1.316596012	1.679576338	1.354354241	1.160628299	1.787455117	1.904777457	1.60618132	1.706086324	1.771950931	1.359548492	1.334488255	1.614483533	1.427799805	1.457000835	1.230233656	1.33206998	1.249847195	1.669519435	1.700531777	1.355035279	1.820124245	1.833144432	2.133417132	1.801572456	1.659644301	1.846806693	1.371229671	1.598036887	1.609920225	1.621897663	1.633973768
L1805Y	1.384788549	1.029550308	1.379078095	1.17629685	1.157713743	0.921426533	1.00967273	1.099719269	0.911813397	0.974573832	1.295467582	1.219406284	1.083770109	1.033736409	0.953206501	1.110862249	1.029809975	0.977862938	1.048363855	1.058107986	1.162422435	1.141925639	1.217189663	1.132251203	0.882476597	0.957522163	1.034007279	1.447766928	1.428581566	1.887985455	1.59602423	1.159004921	1.452528663	1.183240009	1.267134444	1.243921623	1.511976144	1.232466323	1.467708357	1.144829209	1.231839784	1.091350745	1.063588752	1.229139991	1.045109593	1.173454014	1.263957864	1.436029104	1.48931429
L1806Y	1.36595244	1.075134985	1.08389129	1.092614566	1.277755492	1.243277345	1.521426501	1.397675914	1.54434671	1.510018406	1.567061106	1.300316853	1.402974227	1.365960249	1.61180692	1.527737495	1.346723475	1.59658127	1.316549574	1.374045679	1.383068523	1.441331351	1.500106509	1.758705143	1.31855622	1.427577903	1.486988392	1.343332291	1.607231742	1.668043019	1.419457512	1.116490426	1.488227766	1.287281985	1.347407331	1.407966271	1.362842609	1.530343943	1.324664145	1.170927491	1.285515398	1.076119123	1.082419178	1.197806303	1.095009944	1.15624704	1.107598632	1.279884486	1.175715551
L1807Y	0.947711454	0.807572235	1.042819089	0.824398814	0.871246395	0.80232345	0.888569594	0.857703142	0.786322252	0.994519777	1.003656554	1.012746577	1.227487758	1.238152722	1.123351294	1.048647437	1.184926521	0.852337225	0.859480132	0.86659398	0.961254786	0.704296736	0.932224178	0.894810258	0.766577393	0.863399106	0.915758696	1.014753176	1.20764386	1.402974227	1.08426004	1.233786897	1.147321785	1.155330176	1.211449263	1.122823894	1.179173584	1.089060968	1.096363828	0.905417424	1.011251152	0.917759652	0.772828797	1.132595989	0.936243694	1.044679869	1.102725493	1.316176806	0.908951866
L1808Y	0.639413252	0.48227312	0.404695682	0.325742226	0.370837612	0.332287922	0.505398598	0.424324546	0.298777514	0.518918285	0.435815668	0.660184525	0.621171011	0.536743833	0.676420461	0.591020065	0.687197268	0.416419585	0.373586925	0.656659641	0.614759691	0.47774685	0.529146256	0.581150278	0.44118525	0.590078275	0.497121254	0.599048377	0.652834155	0.756745153	0.861760354	0.617162225	0.470636902	0.575693641	0.529155097	0.482127996	0.58880047	0.489931164	0.753297947	0.602096496	0.658931435	0.611060778	0.457092907	0.513995885	0.464822234	0.468730719	0.526380698	0.692336887	0.58890271
L1809Y	0.676846928	0.681892754	0.638509695	0.545839278	0.746052154	0.60355308	0.657630306	0.612609023	0.567062654	0.722463481	0.676948613	0.681813321	0.94239771	0.845762982	1.006334691	1.012721146	1.227600922	1.025469256	0.821445508	0.879703291	0.938419247	0.784478747	0.950193271	1.170927491	0.800187525	0.859578495	0.97373556	1.088715626	1.423484794	1.705679858	1.162736455	1.501202462	1.231233914	1.237912317	1.3004794	1.587685818	1.595440665	1.603185671	1.441131937	1.107738811	1.170879215	1.12015987	1.069123662	1.592100892	1.369278547	1.318440004	1.383112849	1.622300277	1.280530912
L18V05	0.706668884	0.670280156	0.767694265	0.595442888	0.653021909	0.51789247	0.687978349	0.720281312	0.724825618	0.729610602	0.734654423	0.769347737	0.90871322	0.796386813	0.833248935	0.94733031	1.048363855	0.995858311	0.911025753	1.110198955	1.025003429	1.11608242	1.078353745	0.941043741	0.950833664	0.96080027	0.86922931	1.015425076	1.18157313	1.559879777	1.294213024	0.934703487	1.141727747	1.063136839	1.074161747	0.974774469	1.17056727	0.957464224	1.137329437	0.824398814	0.928949102	0.899327209	0.888569594	1.055047437	0.865928187	1.034656989	1.003656554	0.992343752	0.980650135
L18V08	0.733812512	0.864893883	1.06064182	0.816884064	0.823927312	0.788135323	0.708521735	0.714485864	0.654748634	0.836633372	0.754479511	0.961947712	0.946891256	0.931493867	0.847190267	0.738599211	0.906456633	0.843238287	0.872984883	0.950271879	0.862010002	0.844316064	1.01888326	0.832235375	0.740711372	0.746052154	0.800677379	0.855860001	0.861760354	1.017958794	0.949107403	0.879458558	0.936243694	0.99353879	0.999940489	0.954694338	0.986778826	0.940911393	0.946925437	0.795147417	0.800463844	0.726207566	0.81111679	1.03043703	0.741229629	0.908038164	0.94078123	0.97373556	1.006897618
L18V09	0.510834881	0.542335782	0.720107936	0.622465141	0.671415725	0.646636606	0.636687895	0.779400855	0.632192453	0.560110587	0.612492194	0.586708668	0.688677519	0.61485014	0.556014683	0.545561619	0.601504481	0.55779338	0.428527534	0.519263292	0.594434071	0.566407307	0.485044205	0.473135661	0.51469426	0.448468575	0.435682417	0.533017004	0.520571141	0.676416746	0.64587563	0.652786859	0.621201331	0.608315931	0.614624596	0.561686699	0.607208897	0.593147663	0.4572916	0.604690072	0.754382314	0.595318054	0.57986919	0.711537077	0.590339588	0.745334055	0.665390764	0.692756133	0.720428524
L18V10	0.670983357	0.467453579	0.561898704	0.44303329	0.629253359	0.636347349	0.661862931	0.743426956	0.657680247	0.683679769	0.767194829	0.813543688	0.879926457	1.142947093	1.055047437	0.925632639	0.813902326	1.023892293	1.012746577	1.104068946	0.802684076	0.977029189	0.964369847	0.993809293	1.044942931	1.010438529	1.518485909	1.486693905	1.432148234	1.709857095	1.454289046	1.172283585	1.362760682	1.487162264	1.79718941	1.555167583	1.869420843	1.131210075	1.186534394	1.099769821	1.418495962	0.946671009	0.953313924	1.544558761	1.260565375	1.441331351	1.500106509	1.459723547	1.368655791
L18V12	1.152830158	0.95279313	0.936527611	0.732134778	0.903019377	0.743130093	0.963936876	1.115166261	0.856451085	1.106096549	1.089060968	0.948520603	1.25231939	1.036166285	1.168257507	1.175751324	1.233850961	0.961686732	0.865686091	0.922851735	1.032154867	0.883009546	0.888786024	0.97310671	0.821445508	0.826876993	0.885366326	1.10413526	1.324664145	1.358920305	1.069814121	1.049051544	1.082419178	1.115988295	1.012891231	0.991417194	1.080029721	1.307549233	1.258993096	0.875833061	1.076927478	0.97092813	0.920473293	1.123587954	1.186445906	0.994202291	1.000066933	0.948846466	0.897315319
L18V13	0.876072755	0.837750674	1.171310191	1.096333772	0.968227556	1.012534045	0.976462463	1.009753803	1.084689848	1.235031619	1.399706011	1.579148897	1.552755615	1.580670244	1.608435807	1.417928564	1.373120883	1.338394236	1.54010722	1.709733317	1.870378631	1.481288009	1.40622061	1.329272677	1.060494374	1.208281716	1.190931224	1.329785793	1.445000567	1.775527144	1.211509533	1.301740787	1.448627585	1.349073612	1.401452566	1.553795684	1.609320662	1.421086859	1.709269046	1.239372043	1.175672903	1.065937187	1.090290295	1.557982875	1.418293991	1.493855709	1.240983898	1.094335613	1.29726726
L18V15	0.79977328	0.649528667	0.706347234	0.554206344	0.663656961	0.694811248	0.513995885	0.598012448	0.548974477	0.66066128	0.530560929	0.643037867	0.756368324	0.815988933	0.821280902	0.771644066	0.859478431	0.698924798	0.648291098	0.680867309	0.853375556	0.578445966	0.77985509	0.926106541	0.620476949	0.738745121	0.829254651	0.806085296	0.897315319	1.247506308	0.822140528	0.769789982	0.717148495	0.751318809	0.87299713	0.76182305	0.884152795	0.801755673	0.895385629	0.724147508	0.729380742	0.734636968	0.680531589	0.804737959	0.780367356	0.75588265	0.671364919	0.736607439	0.832216932
L20V5M	0.945882766	0.808081085	1.125845011	1.064173466	1.02727869	0.937494335	0.872484423	0.992229179	0.980078054	1.102666508	0.982247303	1.134198516	1.150213059	1.082703709	1.04208393	1.085672736	1.129784891	1.318325595	1.132468785	1.323530719	1.458367983	1.38718023	1.703435385	1.572081246	1.316939923	1.455275292	1.626110122	1.48870752	1.786573493	1.867941454	1.823228035	1.585896468	1.602064365	1.423842705	1.927264918	1.879313337	1.962447532	1.84679268	2.164313032	1.710845276	2.030863008	1.740550563	1.583553953	2.184133156	1.575538889	1.93806995	1.95297166	1.896985612	1.875611604
L20V8M	1.253066552	1.269505196	1.44149213	1.146374468	1.083137357	0.859462879	1.033628168	1.264649039	1.036686127	0.996988194	1.122548002	1.110592098	1.40754077	1.199017074	1.215466181	1.059259989	1.190488711	1.20659042	1.07538342	1.238751574	1.254768156	0.939214147	1.10440741	1.057646319	1.040689436	1.023167139	1.036333088	0.923435191	1.093977107	1.234677011	1.055498357	1.067748322	0.982073312	0.960558166	1.136653111	1.148542011	1.093356841	1.003486495	1.081689117	0.990058976	1.102986569	1.078918206	0.880571452	0.959262629	0.862855979	1.012705792	0.986214347	1.066549104	1.255529988
L20V01	1.236656636	1.090996324	1.168026652	0.986817781	1.04725894	0.976964508	1.021041892	1.082041947	1.026422079	1.188747128	1.200335853	1.331191516	1.411922744	1.355221943	1.488667959	1.361272779	1.284836243	1.224932949	1.110729963	1.102328197	1.093616445	0.831330058	1.093460754	1.04735207	0.890231697	0.879124016	0.886303146	0.874707274	1.012979009	1.171330513	1.008797949	0.996882241	0.965532189	1.087571082	1.075323761	1.101610569	1.08895853	1.036834272	1.082470093	1.029513492	1.075202232	1.021431484	0.947018609	1.093072349	0.957455584	1.063967579	1.069409087	0.992968104	1.100617335
L20V02	0.636489481	0.704739155	0.632295382	0.515735652	0.58430638	0.552269529	0.651124001	0.64820833	0.541136891	0.611678459	0.56250754	0.648980597	0.660017345	0.624732634	0.712806884	0.754992936	0.844726336	0.808618048	0.739776867	0.830441765	0.744026156	0.590959544	0.681650346	0.773303565	0.616541501	0.608079817	0.565597726	0.69184984	0.648926437	0.776887272	0.716269551	0.706829593	0.784475607	0.792525935	0.694365057	0.666031334	0.726647721	0.697827785	0.740877645	0.747854406	0.69987312	0.669597841	0.638842724	0.756247088	0.650607908	0.69389378	0.643145087	0.648613117	0.730186112
L20V03	1.065250219	1.17979334	1.29682524	1.196109187	1.116856741	1.036140928	1.061399925	1.135444692	0.919030752	1.238761511	1.25468592	1.258368778	1.098131911	0.998623471	1.051340233	0.82017197	0.872219293	0.925147656	0.806356359	1.060403225	1.008176698	0.914198773	1.120477484	0.956557663	0.887484984	0.620402962	0.703135594	0.71565866	0.78580185	0.914894064	0.811916912	0.883891138	0.882522799	1.030434541	1.014555468	0.967779366	0.965885786	0.932848784	1.038685151	0.958183046	1.033627589	0.935444297	0.915386595	1.184102123	0.922073348	1.030962533	0.927745481	1.054073669	1.148542011
L20V06	0.923007901	0.97550201	1.028879393	0.885650231	0.912569399	0.859590297	0.7652029	0.846150243	0.887219936	0.90122755	0.87354079	0.831243446	0.915656228	0.872741024	0.915334653	0.813359194	0.928857211	1.016462718	0.77862274	0.865923223	0.773463239	0.648980597	0.721191033	0.732573286	0.666252846	0.551802826	0.577116229	0.570818833	0.643989742	0.73398894	0.71165394	0.770220021	0.665244004	0.773303565	0.86591674	0.992954698	0.952960868	0.878294712	0.955945723	0.845539755	0.958035321	0.950068196	0.924305224	1.003516067	0.888906617	1.004002292	0.977101371	1.003664477	1.048415848
L20V12	0.919595543	0.746790234	0.858386683	0.82069199	0.769624698	0.602177072	0.755451121	0.924439327	0.872484423	0.886016139	0.819427712	0.940683976	0.995857009	0.928383033	0.90122755	0.817764011	0.943691704	1.029000566	0.815620165	1.016082388	0.914894064	0.797299374	0.942811841	0.956737127	0.92574552	0.788531504	0.800789535	0.828244988	0.948254591	1.023167139	1.005073071	0.986402276	0.919591016	0.947315637	1.023347415	1.083934431	0.982073312	0.894932797	1.087105446	1.048791915	1.110090531	1.003486495	0.895244245	1.02417223	0.897029118	0.992573288	0.897945638	0.906826522	0.985933556
L20V1F	1.140728396	1.089167963	1.050295833	0.859777872	0.942725135	0.87354079	0.887467575	1.057336651	1.086944247	1.188792792	1.17598373	1.440471017	1.36998693	1.090322918	1.120167987	0.984418939	1.043683835	1.28704765	1.040689436	1.054203164	0.848772987	0.813242794	1.046417264	0.915386595	0.894743648	0.776398373	0.835405649	0.812901085	0.988010115	1.048791915	0.926019936	0.952960868	0.895244245	0.97300235	1.034334085	1.078918206	1.002190753	0.854390416	1.021098578	0.906592213	0.986214347	0.905543186	0.82376054	1.06650633	0.893372868	1.083928802	0.890231697	0.916090369	1.034938642
L20V5F	0.989714368	0.97781089	0.978952549	1.02024064	1.021675242	1.009466715	0.859777872	0.873562493	0.845652401	0.746907252	0.80231189	0.80133995	0.857764519	0.827864176	0.914239673	0.662938506	0.630194084	0.791145351	0.803599768	0.785608641	0.583550235	0.455268751	0.57314477	0.551802826	0.561374457	0.650085238	0.596096179	0.589309702	0.61453729	0.672441579	0.599618634	0.542081127	0.666416549	0.758683031	0.717174607	0.742698442	0.665983064	0.691071668	1.165263124	0.93269401	0.749518203	0.687030869	0.67667946	0.879486676	0.637199989	0.751798966	0.77705861	0.729664598	0.773026583
L20V7F	0.7708906	0.808081085	0.807791161	0.627843539	0.626009421	0.571954102	0.530173406	0.58065365	0.618614784	0.67071309	0.723662889	0.928383033	0.887395022	0.859596595	0.901523607	0.816479932	0.887021239	0.972904788	0.726329306	0.70959415	0.604017804	0.570822622	0.521945013	0.532371011	0.512352553	0.522376546	0.655544249	0.619698808	0.739362928	0.718792168	0.6817918	0.596096179	0.669687056	0.71165394	0.802812835	0.7800884	0.789819454	0.732916612	0.808884102	0.835067738	0.844395644	0.751266199	0.794050393	0.90622837	0.724203779	0.784475607	0.845273468	0.800478635	0.82612284
L22V02	0.642222573	0.652010614	0.762468233	0.620747057	0.63005424	0.690595737	0.648488039	0.623009395	0.579661693	0.623181276	0.7022671	0.746693168	0.77366372	0.675439303	0.629995895	0.620127896	0.719243962	0.636299158	0.533951776	0.596871321	0.660351001	0.518833007	0.563599815	0.608739424	0.502485256	0.566685628	0.535662852	0.581269246	0.588566747	0.654155145	0.661728388	0.610486193	0.598108607	0.62511812	0.692021919	0.659696734	0.707141824	0.69457789	0.702024902	0.648669129	0.696523319	0.683423448	0.629195445	0.636179098	0.560672668	0.629409628	0.657024004	0.705555787	0.712571946
L22V07	0.630139113	0.57549996	0.73652915	0.599186156	0.65245107	0.566994864	0.550109652	0.660458736	0.5148175	0.669680916	0.579452988	0.722391282	0.719496564	0.716365383	0.697971903	0.663973226	0.766664206	0.855360812	0.712835353	0.848914597	0.845349608	0.667479386	0.821582406	0.785108282	0.570285368	0.661336859	0.687956471	0.747686673	0.725110995	0.885569321	0.796042894	0.688312674	0.579069262	0.673497642	0.648488039	0.726826581	0.771111795	0.728216101	0.790300248	0.746693168	0.77366372	0.693345948	0.666007537	0.801173541	0.610026812	0.764403949	0.754728082	0.855799463	0.84626292
L22V14	0.872145652	0.900385244	1.094646989	0.831949289	0.887789546	0.7740091	0.743880775	0.900689754	0.841508988	0.766426364	0.749090906	0.790940866	0.788164591	0.830603354	0.919297268	1.009135297	1.022648075	0.973737795	0.829635334	0.920676139	0.964992912	0.769064865	0.92562027	0.872704532	0.720688195	0.714742552	0.609067204	0.768789968	0.745680902	1.026140759	0.81699916	0.639301451	0.648488039	0.674917988	0.631875357	0.76322771	0.719873729	0.746693168	0.77366372	0.639626013	0.73803082	0.63823246	0.628229671	0.910809423	0.791524133	0.855799463	0.734715768	0.836511577	0.920461316
L22V15	0.30165638	0.404059167	0.374035533	0.234748089	0.339059671	0.334622754	0.315985408	0.367199709	0.277226259	0.443235227	0.323167657	0.346514321	0.370110625	0.453147485	0.403148355	0.382297496	0.315564778	0.491924695	0.409414806	0.449494539	0.443239206	0.358207113	0.477581822	0.566630395	0.448196518	0.47337585	0.466228239	0.507931989	0.467661643	0.526178783	0.501865732	0.443508952	0.468724419	0.63005424	0.536712879	0.786093766	0.796038038	0.771111795	0.920779947	1.019186432	1.242490362	1.0229624	0.89031904	1.350228729	1.127055701	1.392749716	1.533032692	1.380260948	1.521614685
L22V16	0.588232259	0.675084369	0.593944188	0.573419628	0.7240914	0.751063964	0.794077763	1.060599916	0.929499038	1.038681375	0.986517894	0.966176126	1.011239642	0.890887838	0.935617615	1.014278191	0.99235795	0.833994153	0.8273805	1.112907365	1.228609646	0.858134569	0.920779947	1.10721958	0.835228381	0.77366372	0.729159237	0.810054104	0.909800928	1.101503985	0.984012161	1.159484642	1.077737871	1.199495566	1.322372918	1.239758449	1.080658999	1.147490002	1.291116446	0.957104821	0.927735531	0.762617153	0.809585661	1.052082514	0.826147167	0.972261416	0.783340218	0.910503846	0.958869779
L22V21	1.049635171	1.031449719	1.188075921	0.993672708	1.006378202	1.035295049	0.982541988	0.978295521	1.040086997	1.102445262	1.115002175	1.262620418	1.547783846	1.237734789	1.147308797	1.090186732	1.084393781	1.39343666	1.10721958	1.419560789	1.201032887	0.89031904	1.044129775	1.036532879	1.119706843	0.984012161	1.012300438	0.9482738	0.883445304	1.042068298	1.07071879	0.891891169	1.071607091	1.138604695	1.07204354	0.985479912	1.014023295	0.84844329	0.954493982	1.041808142	1.169183947	0.961340077	0.950227833	1.118428736	1.147720745	1.43850921	1.186455509	1.134940739	1.265940136
L22V22	1.032152662	1.034885456	0.873003509	0.721544182	0.720389531	0.97220952	0.802396691	0.772513684	0.75630923	1.059888988	1.015958496	1.030237156	1.014667314	0.983582081	0.891196128	0.842980737	1.055267642	1.208535708	0.833311698	0.829635334	0.699128981	0.6781719	0.849281952	0.69949806	0.693854963	0.737054057	0.747686673	0.70853331	0.685376144	0.879979547	0.891009525	0.749019189	0.776086214	0.872097344	0.796038038	1.014775562	0.885768339	0.825513507	1.047712893	0.969541255	1.015665553	0.864071566	0.83738267	1.028692552	0.819306002	0.846718209	0.892789198	0.920627688	0.799137628
L22V25	0.629223807	0.587350996	0.571804421	0.376078621	0.371765287	0.49382967	0.433358009	0.54345041	0.496424287	0.623128988	0.560929314	0.66030788	0.701450286	0.773132476	0.815455161	0.827717431	0.9783804	0.945194894	0.802105898	0.971063801	1.015624921	0.853451407	0.753021448	0.764104406	0.693854963	0.655224747	0.599438128	0.741688679	0.702058909	0.779255563	0.840335312	0.613059248	0.758988119	0.820495197	0.830643767	1.136607445	1.025814772	0.843120136	1.047712893	1.0229624	1.033572198	0.95410067	0.855487234	1.156112559	0.965711476	1.104290566	1.170212207	1.292451526	1.172877121
[truncated: 12 more columns]
