# Supplementary material for: Ecophysiological modeling of the climate imprint on photosynthesis and carbon allocation to the tree stem in the North American boreal forest
Source: Copernicus journal article supplement (doi:10.5194/bg-2017-51), 2017-02-23
Supplement: Supplementary file 1 [file bg-2017-51-supplement.zip › Gennaretti_et_al_Supplements.pdf]

## Supplement S1 - Model optimization

The 6 parameters controlling  $V_{cmax}$ ,  $\theta_g$  and  $S$  (Table 1), influencing the GPP values for black spruce, were optimized within a Bayesian framework using observed data at EOBS as reference and Markov Chain Monte Carlo (MCMC) sampling with Metropolis-Hastings steps. The MCMC sampling, through its iterations, only retained the combinations of parameters satisfying the following condition:

$$P_y < e^{(L_y - L_{y-1})}; L_y = \prod_{i=1}^{n_{obs}} N(Obs_i; \mu = Sim_i, \sigma_y) p(\psi_y) \quad (S1)$$

In Eq. (S1),  $P_y$  is a random number between 0 and 1 picked-up at iteration  $y$  and  $L_y$  is the model posterior probability computed with the product between the model likelihood ( $\prod_{i=1}^{n_{obs}} N(Obs_i; \mu = Sim_i, \sigma_y)$ ) and the parameter priors ( $p(\psi_y)$ ). Here we assumed that the model likelihood can be calculated using normal probability densities where  $Obs_i$  is an observed GPP daily value,  $Sim_i$  is its simulated equivalent and  $\sigma_y$  is the standard deviation of deviations between observation and simulation at iteration  $y$ . Moreover,  $\psi_y$  is the hyperparameter vector at iteration  $y$  composed of the 6 parameters to be optimized plus  $\sigma_y$ . The prior for the 6 parameters was supposed to be uniform over an acceptable range (Table S1), while a Jeffreys prior was used for  $\sigma$  ( $\propto 1/\sigma$ ). In this way, the MCMC sampling maximizes the model posterior probability according to model possibility (i.e. the ability of the model to approximate plausible GPP daily values).

The 12 parameters strongly influencing the MAIDEN Dstem for black spruce (Table 1) were optimized similarly to those 6 influencing GPP. In the computation of the model likelihood (Eq. (S1)),  $Obs_i$  was an observed RWhighF value and  $Sim_i$  was a simulated detrended yearly Dstem (similarly to RWhighF the detrending was achieved by subtraction by a 10-year cubic smoothing spline). To allow the comparison, both  $Obs$  and  $Sim$  were transformed to z-scores. We preferred to optimize MAIDEN on RWhighF values because tree-ring high frequencies are much more robust regionally across sites and trees than low frequencies. Observed and simulated low frequencies were only compared after the optimization of the model parameters.

In the calibration process, to verify the convergence of the sampling, we ran 50 Markov chains starting each time from random initial conditions (i.e. initial values of the parameters in their acceptable ranges). Finally, for each chain, we only selected the iteration with higher model posterior probability. In this way, we got 50 blocks of potential parameters. The convergence of the sampling is shown by the sharp parameters' posterior densities (Figs. S2 and S3) and by the stabilization of the model posterior probability in the 50 chains (Fig. S1). The acceptable ranges (i.e. biologically sound) in which the parameters were sampled are shown in Table S1.

The MAIDENiso GPP is determined by the 6 calibrated parameters (Table 1), but is also influenced by variations in the canopy biomass, which, in part, depend on the values of the parameters controlling the carbon allocation. To avoid that the parameter selection during the MCMC sampling used to calibrate the MAIDENiso GPP was sensitive to the values of the parameters controlling the carbon allocation, we calibrated the 6 GPP parameters fixing the carbon contained in the canopy

reservoir at a constant value. Subsequently, during the calibration of the parameters controlling the carbon allocation, the carbon in the canopy was allowed to vary. In this way, the GPP calibration is independent from the calibration of the carbon allocation, but the parameter selection for the allocation depends on the GPP parameters.

For both the GPP and the carbon allocation, we selected a block of parameters that we called “Plausible Block” (“Plausible Block GPP” and “Plausible Block Stem”) and often used to illustrate the results. The selection was based on these criteria:

$$(L_y > L_{mode}) \& \left( \sum_{z=1}^n (ParL_{\psi_{y,z}} \cdot ParRange_z) = Maximum \right) \rightarrow (\psi_y = Plausible\ Block) \quad (S2)$$

Basically, the model posterior probability with this block of parameters ( $L_y$ ) must be higher than the mode of the 50 retained iterations (Fig. S1) and the sum of the products between the parameters’ posterior probabilities ( $ParL$ ; Figs. S2 and S3) and the spans of their acceptable ranges ( $ParRange$ ) must be maximized.  $\psi_y$  is the hyperparameter vector at iteration  $y$  (here not including  $\sigma_y$ ) composed of  $n$  parameters. The reader should note that the two Plausible Blocks are only a possibility over the retained iterations, which were used to simplify visualizations and interpretations.

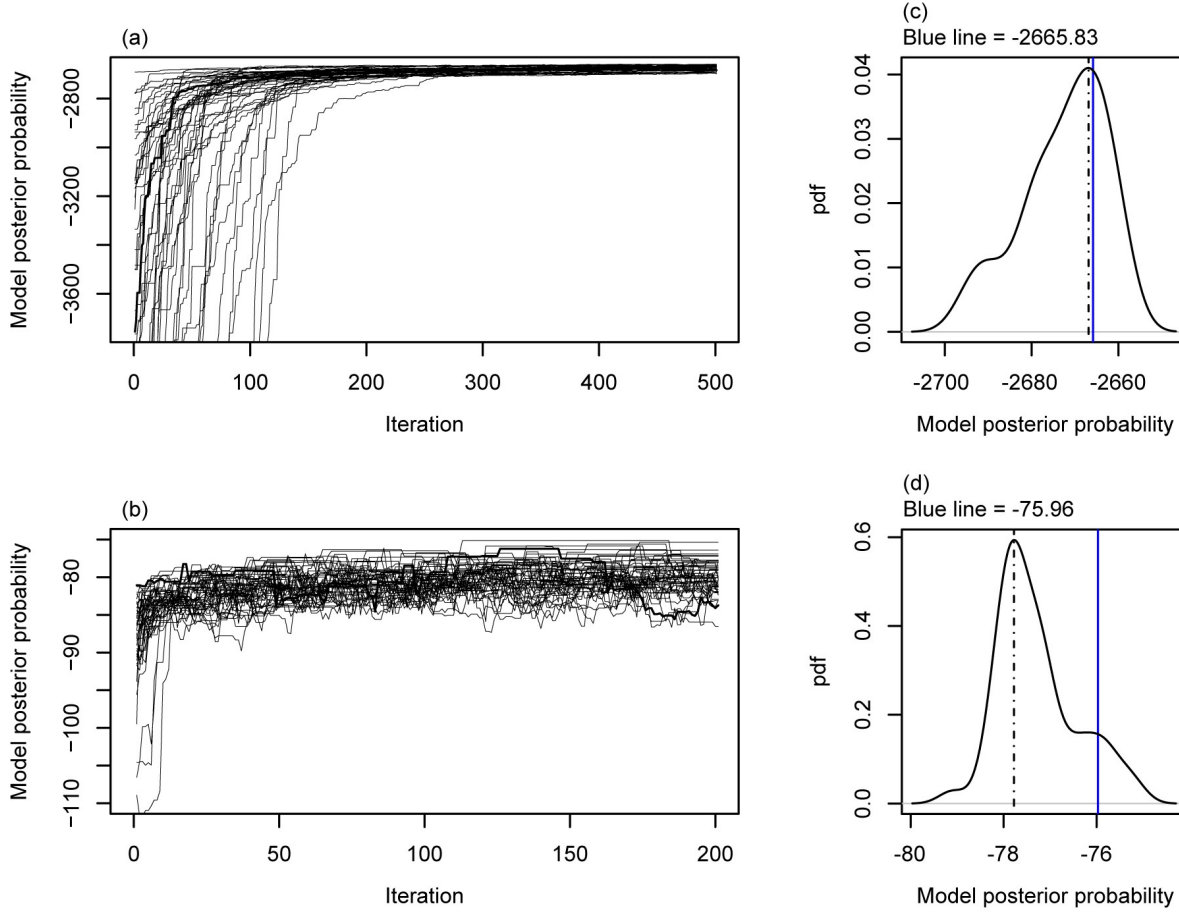

Figure S1: Evolution of the model posterior probability in the 50 Markov chains used in the MAIDENiso calibration. (a) Calibration of GPP (i.e. 6 parameters). (b) Calibration of carbon allocation to the stem (i.e. 12 parameters). Plots (c) and (d) show the model posterior density of the retained 50 blocks of parameters (one block per each chain of (a) and (b)). Vertical dashed line is the mode and blue line is the value with the respective Plausible Block.

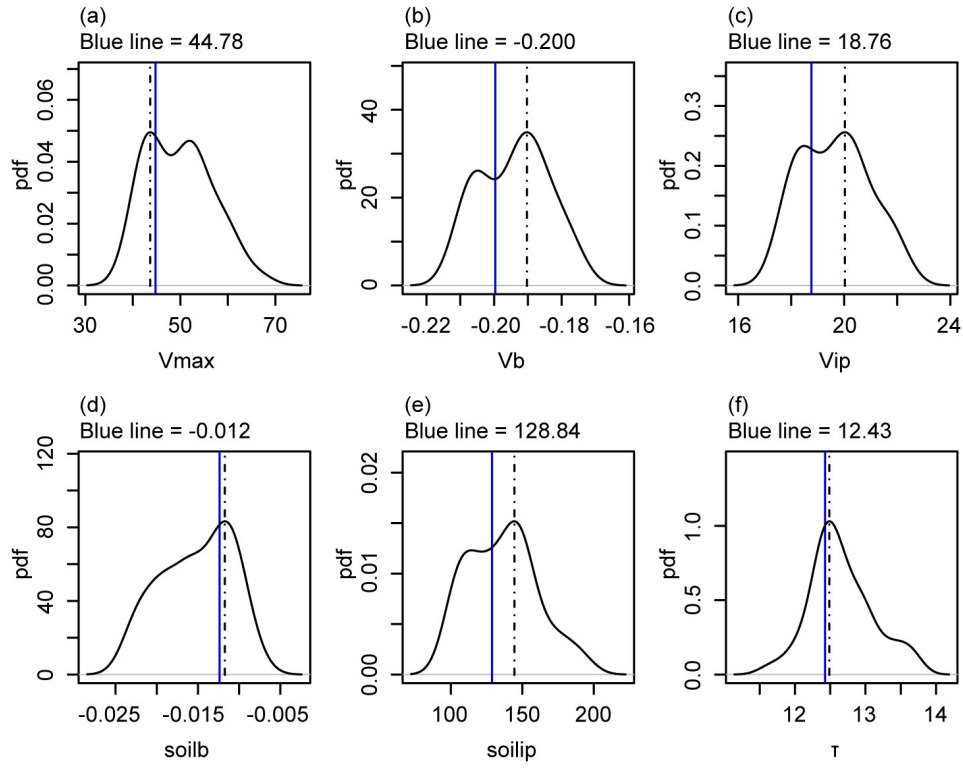

**Figure S2: Parameters' posterior densities (pdfs based on 50 values). (a)  $V_{max}$ , (b)  $V_b$ , (c)  $V_{ip}$ , (d)  $soilb$ , (e)  $soilip$ , and (f)  $\tau$ . Vertical dashed line is the mode and blue line is the value with Plausible Block GPP.**

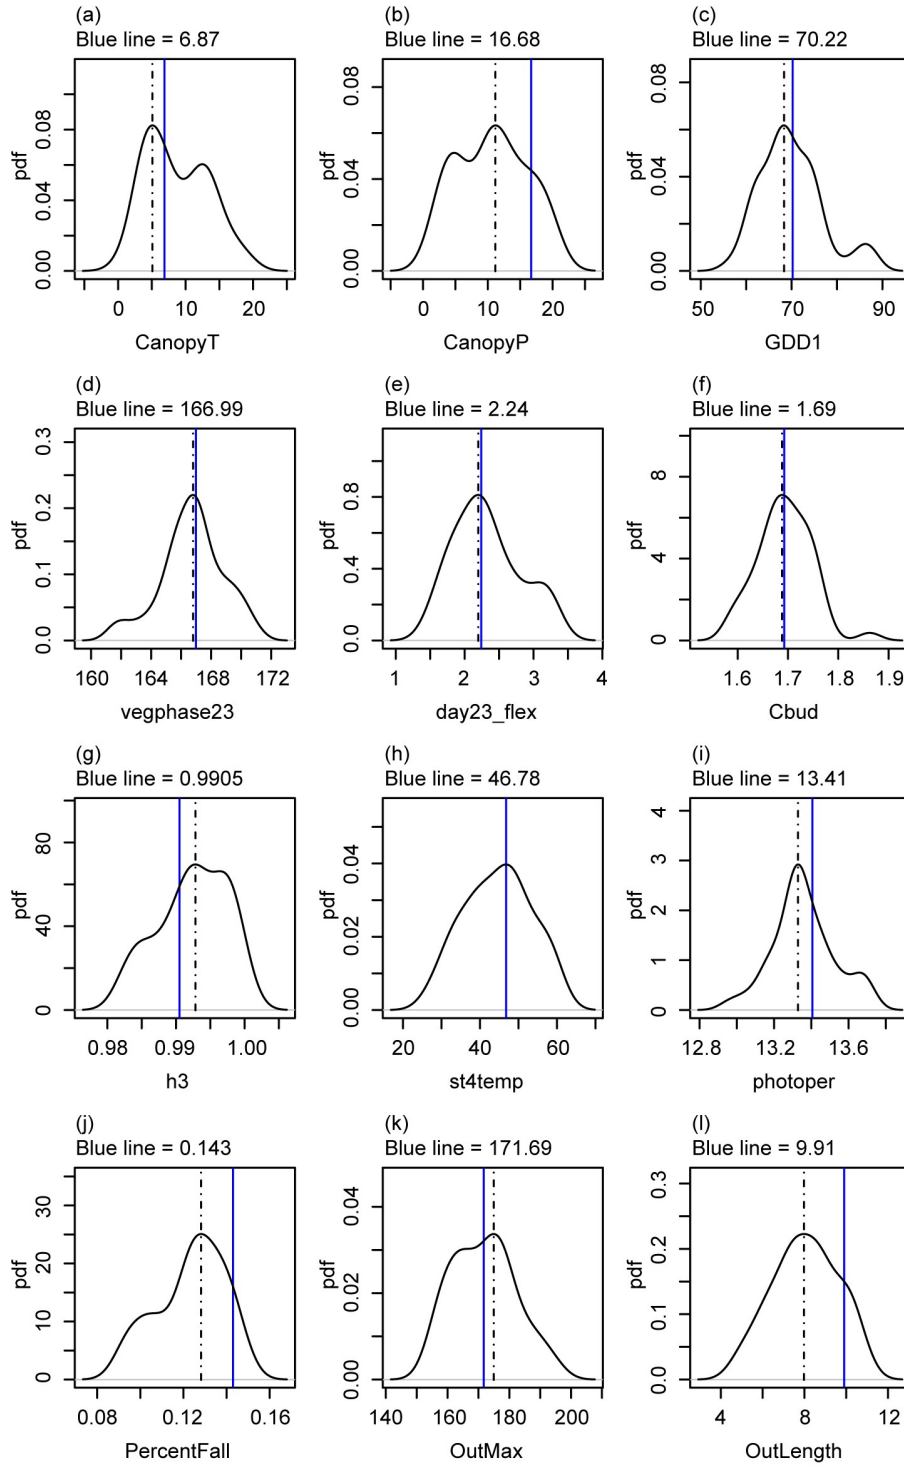

**Figure S3: Parameters' posterior densities (pdfs based on 50 values). (a) *CanopyT*, (b) *CanopyP*, (c) *GDD1*, (d) *vegphase23*, (e) *day23\_flex*, (f) *Cbud*, (g) *h3*, (h) *st4temp*, (i) *photoper*, (j) *PercentFall*, (k) *OutMax*, (l) *OutLength*. Vertical dashed line is the mode and blue line is the value with Plausible Block Stem.**

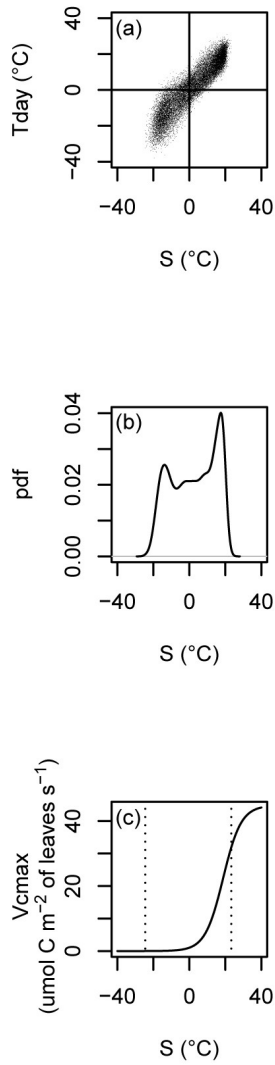

Figure S4: Temperature dependence of maximum carboxylation rate ( $V_{cmax}$ ) when MAIDENiso is run with the parameters of Plausible Block GPP at the Quebec Eastern Old Black Spruce site (EOBS). (a) Relationship between daytime temperature ( $T_{day}$ ) and its transformation used in the  $V_{cmax}$  equation ( $S$ ). (b)  $S$  probability density at EOBS. (c) Relationship between  $S$  and  $V_{cmax}$ . The vertical dashed lines show the range of  $S$  values at EOBS.

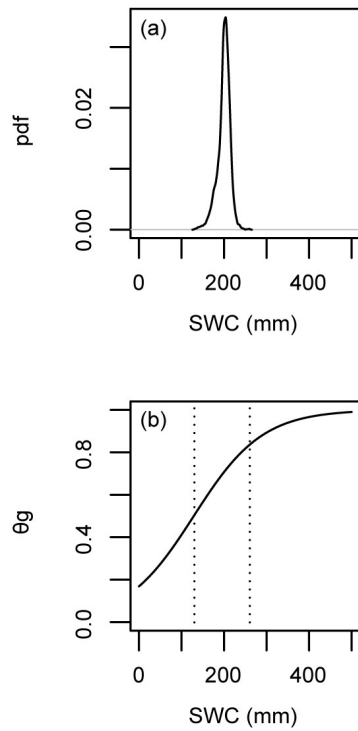

**Figure S5: Water stress level ( $\theta g$ ) function when MAIDENiso is run with the parameters of Plausible Block GPP at the Quebec Eastern Old Black Spruce site (EOBS). (a) Soil water content ( $SWC$ ) probability density at EOBS. (b) Relationship between  $SWC$  and  $\theta g$  (higher values correspond to lower stress). The vertical dashed lines show the range of  $SWC$  values at EOBS.**

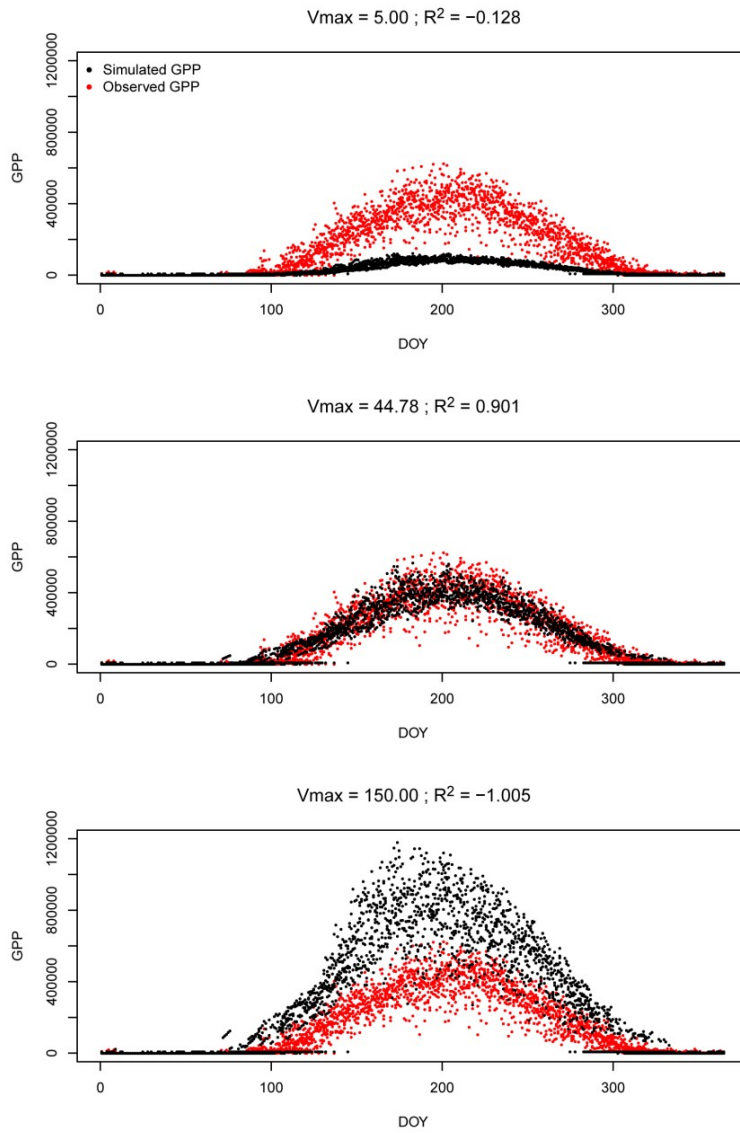

Figure S6: Sensitivity of the daily GPP simulated annual cycle (umol C m<sup>-2</sup> day<sup>-1</sup>) to the  $V_{max}$  parameter influencing  $V_{cmax}$ . Only  $V_{max}$  varies while the other parameters were fixed to the values of Plausible Block GPP. In the top (bottom) plot,  $V_{max}$  was fixed to the lowest (highest) value of its prior acceptable range. In the middle plot, it was fixed to the selected value for Plausible Block GPP. The  $R^2$  between observations and simulations and the parameter value are reported for each plot.

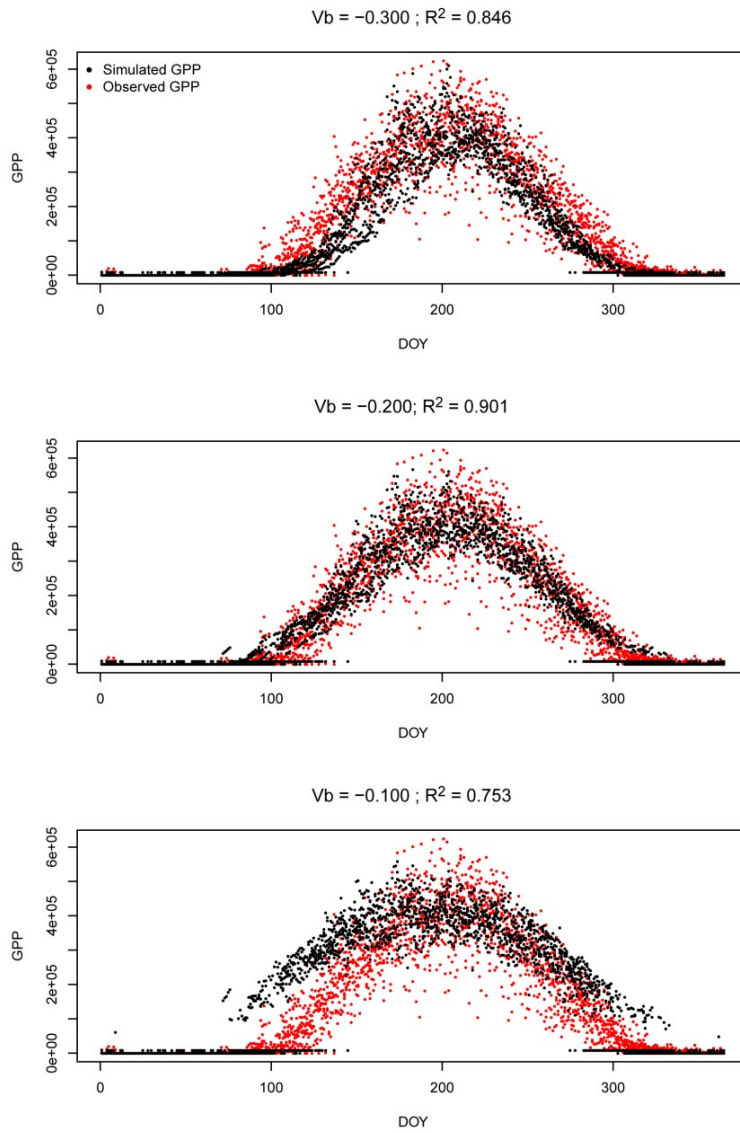

Figure S7: Sensitivity of the daily GPP simulated annual cycle (umol C m<sup>-2</sup> day<sup>-1</sup>) to the  $V_b$  parameter influencing  $V_{cmax}$ . Only  $V_b$  varies while the other parameters were fixed to the values of Plausible Block GPP. In the top (bottom) plot,  $V_b$  was fixed to the lowest (highest) value of its prior acceptable range. In the middle plot, it was fixed to the selected value for Plausible Block GPP. The  $R^2$  between observations and simulations and the parameter value are reported for each plot.

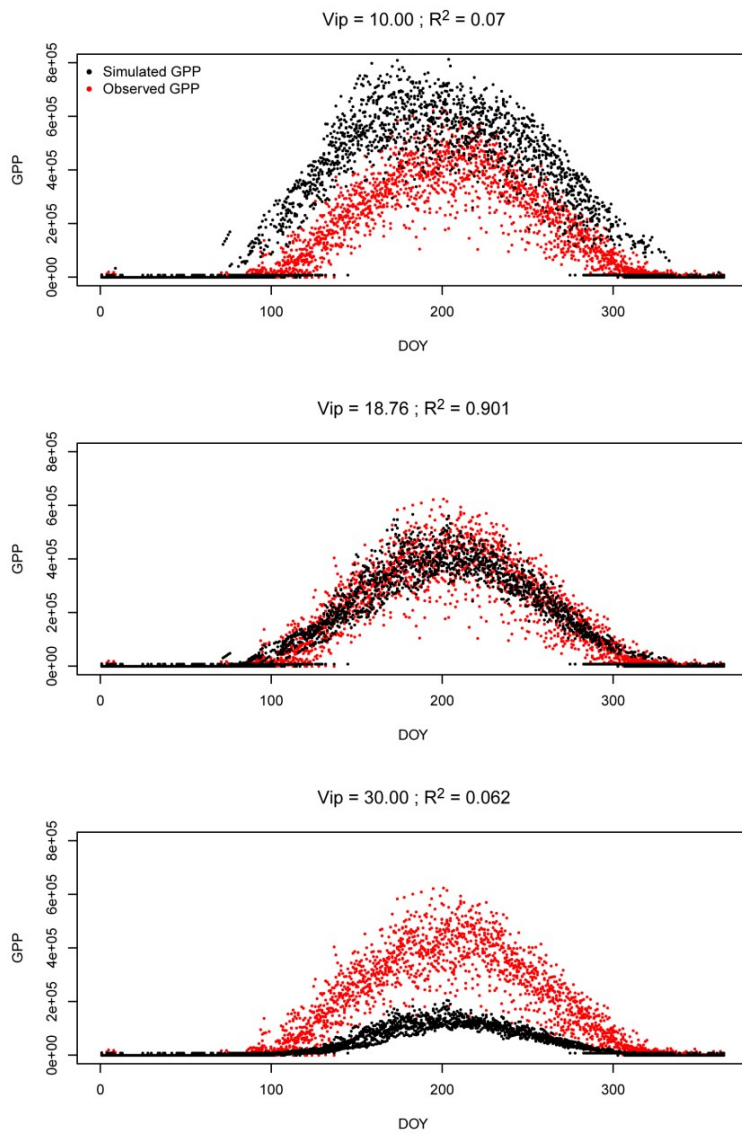

Figure S8: Sensitivity of the daily GPP simulated annual cycle ( $\mu\text{mol C m}^{-2} \text{ day}^{-1}$ ) to the  $V_{ip}$  parameter influencing  $V_{cmax}$ . Only  $V_{ip}$  varies while the other parameters were fixed to the values of Plausible Block GPP. In the top (bottom) plot,  $V_{ip}$  was fixed to the lowest (highest) value of its prior acceptable range. In the middle plot, it was fixed to the selected value for Plausible Block GPP. The  $R^2$  between observations and simulations and the parameter value are reported for each plot.

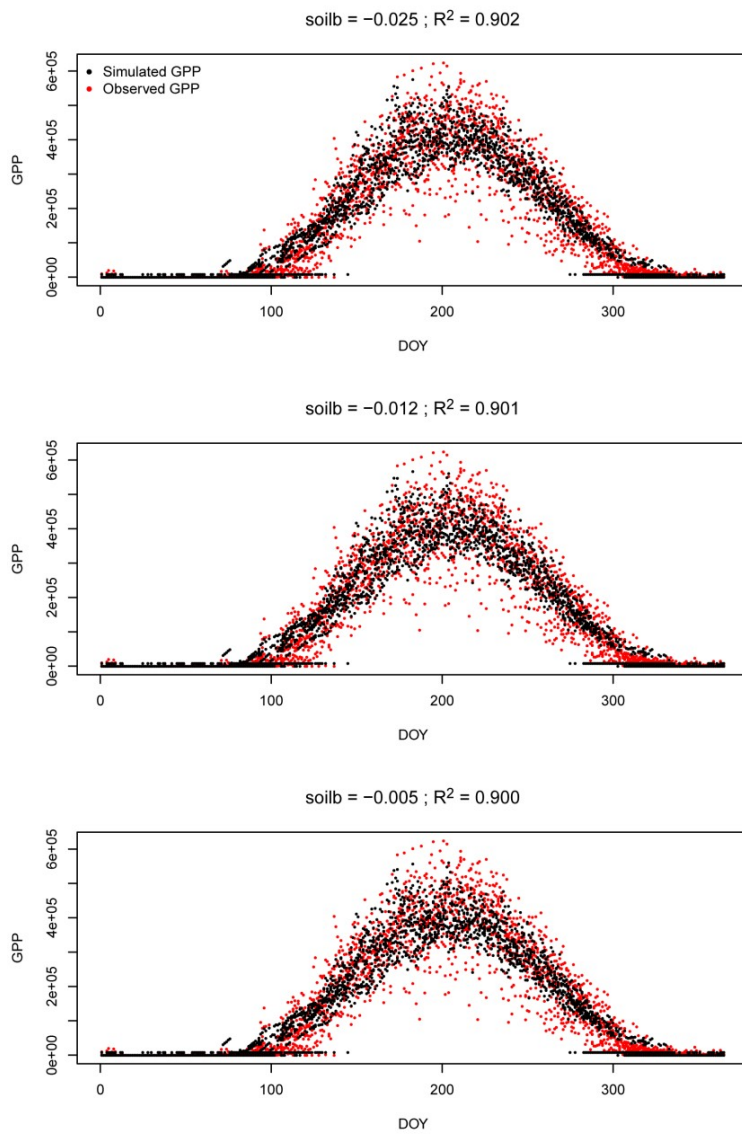

**Figure S9: Sensitivity of the daily GPP simulated annual cycle ( $\mu\text{mol C m}^{-2} \text{ day}^{-1}$ ) to the *soilb* parameter influencing  $\theta g$ . Only *soilb* varies while the other parameters were fixed to the values of Plausible Block GPP. In the top (bottom) plot, *soilb* was fixed to the lowest (highest) value of its prior acceptable range. In the middle plot, it was fixed to the selected value for Plausible Block GPP. The  $R^2$  between observations and simulations and the parameter value are reported for each plot.**

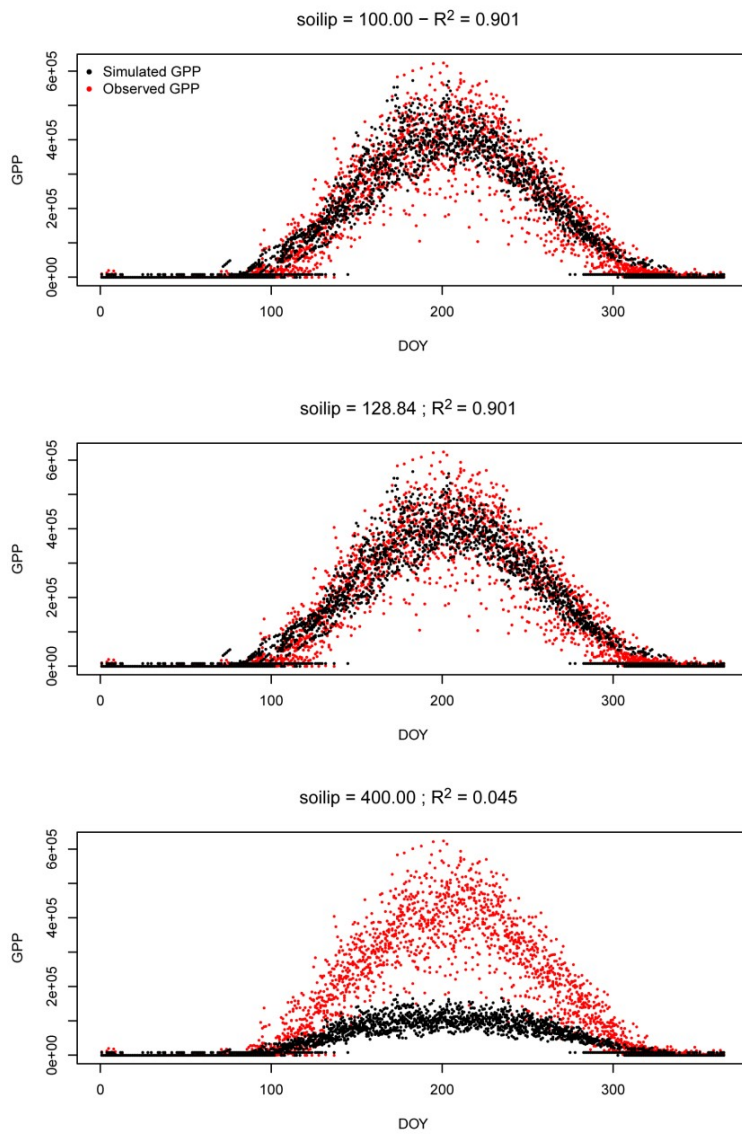

Figure S10: Sensitivity of the daily GPP simulated annual cycle ( $\mu\text{mol C m}^{-2} \text{ day}^{-1}$ ) to the *soilip* parameter influencing  $\theta g$ . Only *soilip* varies while the other parameters were fixed to the values of Plausible Block GPP. In the top (bottom) plot, *soilip* was fixed to the lowest (highest) value of its prior acceptable range. In the middle plot, it was fixed to the selected value for Plausible Block GPP. The  $R^2$  between observations and simulations and the parameter value are reported for each plot.

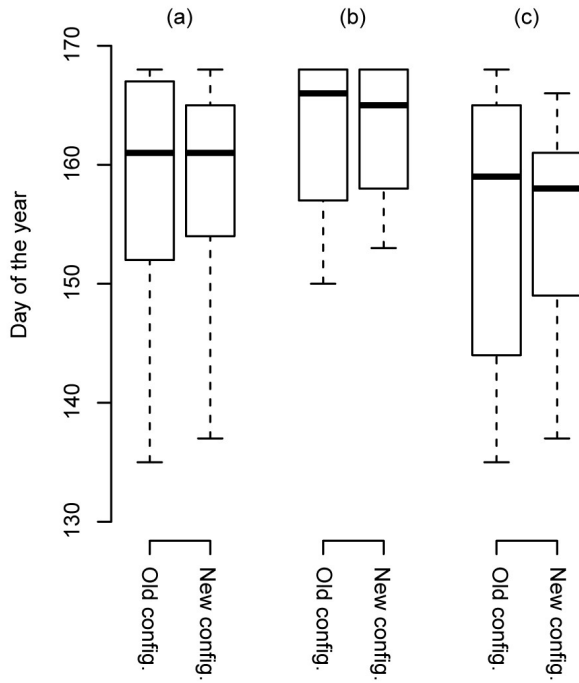

Figure S11: Growing season start (quartiles and extreme values) during the 1950-2010 (a), 1950-1970 (b) and 1990-2010 (c) periods. The parameters of Plausible Block Stem are used with (“New config.”) or without (“Old config.”) the mechanism to have more smoothed yearly variations.

5

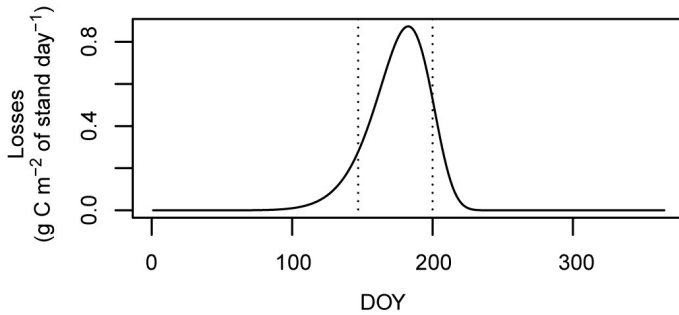

Figure S12: Simulated annual cycle of carbon losses from the canopy (i.e. leaf shedding) when MAIDENiso runs with the parameters of Plausible Block Stem and the potential maximum amount of carbon that the canopy can contain during the year is 307 g C m<sup>-2</sup> of stand (this value is the average of the simulated *AlloCcanopy<sub>j</sub>* values). Vertical dashed lines show the period over which the 80% of the yearly losses are observed.

**Table S1: Comparison between prior and posterior ranges of calibrated parameters.**

| <b>Parameter</b>       | <b>Units</b>                                     | <b>Prior Range</b> | <b>Posterior range</b> | <b>Value in Plausible Block</b> |
|------------------------|--------------------------------------------------|--------------------|------------------------|---------------------------------|
| <i>V<sub>max</sub></i> | umol C m <sup>-2</sup> of leaves s <sup>-1</sup> | 5 / 150            | 39 / 67                | 44.778                          |
| <i>V<sub>b</sub></i>   | NA                                               | -0.30 / -0.10      | -0.21 / -0.17          | -0.200                          |
| <i>V<sub>ip</sub></i>  | °C                                               | 10 / 30            | 17.5 / 22.3            | 18.763                          |
| <i>soilb</i>           | NA                                               | -0.025 / -0.005    | -0.023 / -0.008        | -0.012                          |
| <i>soilip</i>          | mm                                               | 100 / 400          | 102 / 193              | 128.837                         |
| <i>τ</i>               | days                                             | 1 / 20             | 11.6 / 13.7            | 12.428                          |
| <i>CanopyT</i>         | NA                                               | 0 / 20             | 0.54 / 19.24           | 6.872                           |
| <i>CanopyP</i>         | NA                                               | 0 / 20             | 1.70 / 19.85           | 16.683                          |
| <i>GDDI</i>            | °C                                               | 10 / 120           | 56.75 / 87.05          | 70.220                          |
| <i>vegphase23</i>      | day of the year                                  | 152 / 181          | 161.5 / 171.0          | 166.988                         |
| <i>day23_flex</i>      | years                                            | 1 / 10             | 1.53 / 3.29            | 2.240                           |
| <i>Cbud</i>            | g C·m <sup>-2</sup> of stand·day <sup>-1</sup>   | 1 / 3              | 1.59 / 1.86            | 1.692                           |
| <i>h3</i>              | fraction (0-1)                                   | 0 / 1              | 0.983 / 1.000          | 0.991                           |
| <i>st4temp</i>         | °C                                               | 1 / 100            | 27.53 / 59.11          | 46.777                          |
| <i>photoper</i>        | hours                                            | 12 / 14            | 12.96 / 13.72          | 13.406                          |
| <i>PercentFall</i>     | fraction (0-1)                                   | 0.09 / 0.15        | 0.093 / 0.149          | 0.143                           |
| <i>OutMax</i>          | day of the year                                  | 150 / 200          | 154.2 / 195.0          | 171.685                         |
| <i>OutLength</i>       | NA                                               | 4 / 12             | 4.80 / 10.80           | 9.905                           |
