# Supplementary material for: Ecophysiological modeling of the climate imprint on photosynthesis and carbon allocation to the tree stem in the North American boreal forest
Source: Copernicus journal article supplement (doi:10.5194/bg-2017-51), 2017-02-23
Supplement: Supplementary file [file POINT-BY-POINT.pdf › POINT-BY-POINT.pdf]

We are very happy that all reviewers appreciated our work and that our paper has already been used for teaching purposes (see the interactive comment #1). We also acknowledge the reviewers for their constructive comments that improved the paper. Here below you will find a point-by-point response for all comments of the reviewers.

**Reviewer #1:**

**Comment 1**

**0. Abstract:**

**0.1. clarify/revise results statement, what is meant by 'full spectrum', give specifics.**

**Response**

We reformulated the sentence:

P 1 L 17 "MAIDEN explains 90% of the observed daily gross primary production variability, 73% of the annual ring width variability and 20-30% of its high frequency component (i.e. when decadal trends are removed)."

**Comment 2**

**Introduction:**

**1. pg 2, l. 1: define 'secondary growth' at first use.**

**Response**

We added the definition.

P 1 L 30 "secondary growth is the increase of the girth of the plant roots and stems"

**Comment 3**

**2. pg 2, l. 5: also roots; e.g. Moorcroft (2006) and description in section 2.1.**

**Response**

We modified the sentence and added the reference:

P 2 L 3 "Indeed, carbon allocated in different tree components (e.g. canopy, stem or roots) has a specific function and is stored for a different length of time (Moorcroft, 2006)"

**Comment 4**

**3. pg 2, l. 25: I think you mean to say that these models should be able to simulate the following observed phenomena: (i,ii,iii).**

**Response**

We modified as suggested.

P 2 L 23 "Such models should be able to simulate the following observed phenomena: ..."

**Comment 5**

**4. pg 2, l. 31-32: briefly explain for those unfamiliar with its development, why MAIDEN is an ideal model with which to work for the purposes of this study. For instance, in the sentence prior, you've noted that it was developed for Mediterranean and temperate climates; why should it be suitable for simulations in boreal climates? Here you can borrow from section 2.1 the salient descriptive points, saving for section 2.1 the description of the modifications and the experiments performed for this study. But make the argument why the model should be suitable for the present study (noting also your point that it has never been applied in 'environments mostly sensitive to cold temperatures').**

**Response**

We added a sentence:

P 2 L 29 "MAIDEN offers an ideal framework to analyze the impact of introducing in the model relevant processes for carbon assimilation and allocation in temperature sensitive boreal trees. Indeed, the model simultaneously simulates the course of photosynthesis and sets different

phenological phases to determine the allocation of carbon to different plant compartments in a dynamical manner.”

#### Comment 6

Materials and Methods:

5. pg 3, l. 21: I think you mean here: model has not been used to simulated forest growth in boreal conditions. See also note 4.

#### Response

We modified as suggested.

P 3 L 16 “Up to now, the model has never been used to simulate forest growth in boreal conditions.”

#### Comment 7

6. pg 3, l. 19-21: "Drought and water stresses are well take into account": support this statement with citations and references, but otherwise I suggest to save such statements for the Results section.

#### Response

We deleted the sentence.

#### Comment 8

0. Abstract:

0.2. use of the word robust means you have done validation or out-of-sample tests of the model. Have the authors done so?

7. pg. 3, l. 29: describe how the parameter estimates are cross-validated. To determine 6 or 12 parameters simultaneously, conditioned on two variables, must require a lot of data but also out-of-sample testing [to revisit after reading Supplement 1].

#### Response

We added a cross-validation exercise of parameter values:

Figs. S5, S9 and S10.

Supplement P 2 L 12 “The robustness of the parameters’ posterior distributions was tested with a cross-validation exercise. Firstly, we compared the parameters’ posterior densities, when the optimization was executed on the full period with observed data, to those obtained with half data (Figs. S5 and S9). However, we have to recall that in total we have 2920 observed daily data between 2003 and 2010 to optimize the 6 parameters influencing the GPP, and only 61 observed ring width annual data between 1950 and 2010 to optimize the 12 parameters influencing Dstem. Subsequently, the distributions of the parameters influencing Dstem were also compared to those obtained independently with data from specific sites (the used black spruce ring width data comes from five different riparian forests; Fig. S10).”

#### Comment 9

[to delete? 8. pg. 4, l. 1-30: please revise to better distinguish prior formulation of MAIDEN and the modifications introduced here. What is existing, what is new here? ]

#### Response

We added a sentence:

P 4 L 8 “The computations of  $V_{cmax}$  and  $\theta_g$  used here are identical to those of the prior formulation of MAIDEN (Gea-Izquierdo et al., 2015).”

#### Comment 10

9. pg 4, l. 30: Euler’s method might not be suitable in the case of a large time step, large change in the rate of change, or both; consider a Runge-Kutta solver, relatively straightforward to implement.

#### Response

We understand the reviewer comment. However, the Euler's method is a particular case of the Runge–Kutta family of methods and we think that a different solver will not change significantly our results and interpretations concerning the need to take into account acclimation of photosynthesis to temperature for boreal trees.

#### Comment 11

10. pg 5, l. 10-15, 16-20, 21-25: the determination of phenological phases seems highly specified for a modeling striving to be more ecophysiologicaly based (Introduction). Instead of basing these phases on correlation studies (empirical), could they be estimate from other properties of the environment, or prognostic variables within the existing model? In addition, please justify all choices of hard parameters, for instance, pg 5, l. 19, pg 6, l. 22.

#### Response

We modified the text to better justify our choices.

P 5 L 9 “Based on previous studies on black spruce forests (Girardin et al., 2016; Ols et al., 2016; Mamet and Kershaw, 2011), we modified the model to consider the effect of the previous year April precipitation and July-August temperature likely influencing the length and the thermal-hydraulic stress of the previous growing season, respectively. Previous year climate conditions of specific months are known to influence shoot extension of boreal trees likely because they control accumulation of resources in the buds (Salminen and Jalkanen, 2005).”

P 5 L 22 “In this way, *AlloCcanopy<sub>j</sub>* may vary between the 70% and the 100% of *MaxCcanopy* as in the previous version of the model (Gea-Izquierdo et al., 2015).”

P 6 L 20 “The value 0.8 was chosen to force a minimum threshold of C allocation to the stem in this phase (at least 20%) and to guarantee the correspondence between the inflection point and the temperature where roughly 50% of  $CT_i$  is allocated to the stem.”

#### Comment 12

##### Results/Discussion:

11. General remark, section 2.3: if the simulation produces a good out-of-sample or independent fit to observed predictors, then it would be good to diagnose the model: what factors are most important controls on the fidelity of the simulations? Because this is an ecophysiological modeling study, this would be much more instructive than the statistical regression analysis, although the latter may be used to support the interpretation with respect to modeled variables. Therefore, please add ecophysiological diagnostics to this section or a new section 2.4.

18. Section 3.2: Revise the title for English; perhaps: Mechanistic diagnostics? And consolidate mechanistic results here, with their discussion in the Discussion section. Moving the Supplemental Figures that are most relevant for the central elements of the argument into the main text, and by expanding this part of the results, this may address my previous comment #11 on Section 2.3. This will help the reader understand what is going on in the simulation that explains the consistency with observations.

#### Response

We modified the title of section 3.2 as suggested. We believe that mechanistic results for GPP are already shown and discussed in depth (see Figs. 6, S4, and S12 to S18). We consolidated results and discussion of mechanistic rules for Dstem. Figs. 7 and 8, illustrating how specific processes impact the MAIDEN simulations, were indeed modified to show how the parameter selection of those processes alters the correlation with observed data. We also added Figs. S6, S7, S11, S20 in addition to the already existing Figs. S8, S19 and S21.

#### Comment 13

12. Section 3.1, pg 9, l. 3: explain here and/or in the Table 1 caption the definition and how to interpret the series of numbers that are in the last column of the Table. What exactly do you mean

by "sharp" here and on pg 11 (I think I know, but give a more objective description of what you mean for the reader).

#### Response

We added a sharpness definition in the text:

P 8 L 20 "The posterior distributions of the parameters were quite sharp (Fig. S4; Table 1; by sharpness we mean the shrinking of the distribution relative to the prior acceptable range toward a posterior distribution with a well-defined, narrow peak). Sharp distributions with small posterior ranges relative to the prior ones indicate sensitive parameters."

We added how to interpret prior and posterior ranges in the caption of Table 1:

"Small posterior ranges relative to the prior ones indicate sensitive parameters."

#### Comment 14

13. pg 9, l. 7-12: "However, the ensembles of daily and annual time series retained by the MCMC sampling were not always centered on the observed time series (Fig. 5)..." Revise and expand to reflect that the simulated annual GPP values overestimate the actual GPP at low observed GPP. This will better reflect the excellent information content of this figure.

#### Response

We modified as suggested.

P 8 L 29 "However, the ensembles of daily and annual time series retained by the MCMC sampling were not always centered on the observed time series (Fig. 3), in particular the simulated annual GPP values often underestimated the actual GPP especially at low observed GPP."

#### Comment 15

14. pg. 9, l. 13-17: Put uncertainty estimates on Fig 6 and use them in the description of results and in discussion later.

#### Response

We modified the figure adding the thresholds of significance ( $p < 0.05$ ).

#### Comment 16

15. pg 9, l. 13-17: "The model explained about 20-30% of the 15 observed yearly R<sub>WHighF</sub> variability corresponding to correlations of 0.58-0.66 (Fig. 4b). This is a good result because simulated detrended annual GPP values (i.e. photosynthetic assimilation before any carbon allocation) had only negative R<sup>2</sup> with R<sub>WHighF</sub> (Fig. 4c; meaning performance worse than a straight line centered on R<sub>WHighF</sub>). This suggests that the modified MAIDEN daily partition of carbon in the plant compartments significantly improved the concordance with tree-ring observations." Although I am not sure I understand this result (and its discussion; please clarify, in mechanistic terms, why we see the results in fig 4c?): If the correlations in Fig 4c are statistically significant (estimate p-values), then this is an even more important result than described, because not only are the model improvements an important advance, but they correct a result that would otherwise produce the opposite correlation.

#### Response

Correlations between GPP and R<sub>WHighF</sub> are positive ( $r = 0.3$ , see text over Fig. 2c), such as those between D<sub>stem</sub> and R<sub>WHighF</sub> ( $r = 0.65$ , see text over Fig. 2b). However, R<sup>2</sup> values between GPP and R<sub>WHighF</sub> are negative (see Fig. 2c), while those between D<sub>stem</sub> and R<sub>WHighF</sub> are positive (see Fig. 2b). To clarify this point, we have shown the equation to compute the R<sup>2</sup> (Eq. 8) and a comparison between GPP, D<sub>stem</sub> and R<sub>WHighF</sub> (Figs. S6 and S7).

#### Comment 17

16. pg 9, l. 20-24: Fig 7b, here and elsewhere: it is an interesting result! But where  $r$  is given, also give effective degrees of freedom and p-value; interpret based on the p-value as statistically significant or nonsignificant.

#### Response

We now provide all df and p-values of correlation coefficients in the text.

#### Comment 18

17. General remarks on sections 2 and 3: Reorganize the content in these sections into separate Results (section 3) and Discussion Sections (new Section 4), with subsections as appropriate. Results are what was objectively found and will be discussed; Discussion is for interpretation of the results. As it is, Results and Discussion are entwined, but it would clarify for the reader to separate and distinguish them. I would suggest to focus the Results on the following items of interest: (1) sensitivity of the simulations to specified parameters; (2) mechanistic and regression-based diagnostics. I would then put in the Discussion the following argument: (1) The results are sensitive to parameter estimation in the following ways: .... but: (2) Comparison with independent observations suggest MAIDEN as revised produces more accurate simulation of GPP, TRW, intra-growing season dynamics ... which are (3) consistent with response function analysis, and (4?) here are some predictions made by the model/simulations, that could be tested with additional observations.

Once these revisions help to reorganize the essential content of the paper, it will be easier to evaluate the expanded ecophysiological interpretation, which I think should be more central to the main thrust of the paper than the response function analysis (Abstract; section 3.3).

#### Response

We did not modified the paper as the reviewer suggested because the proposed modifications are much more than a reorganization and because the current structure is already well defined according to us:

#### 3. Results and Discussion

##### 3.1 GPP and tree-ring growth variability explained by MAIDEN

##### 3.2 Mechanistic diagnostics

##### 3.3 Comparison between MAIDEN and response functions

##### 3.4 Limits and error sources of the study

Furthermore, the ecophysiological interpretation is already central in the Results and Discussion section (subsection 3.3 on the comparison with response functions is only approximately 1/6 of section 3).

#### Comment 19

19. p. 9, l. 30: "...is sensitive to all..." Discuss how the sensitivity of the results to parameter estimates related to "Vcmax or thetaG, except soilb", complicate the diagnostic interpretation. Are there multiple controls that all could produce a similar result and good fit to observations?

21. I would appreciate more discussion of fig S2. Interpret the bimodal structure of the posterior probabilities; connect to the plausible value descriptions in the last column of Table 1.

#### Response

The impact of the parameters on the simulations is already shown on Figs. 6 and S14-S18. We added and modified some text related to this reviewer's comment:

P 8 L 20 "The posterior distributions of the parameters were quite sharp (Fig. S4; Table 1; by sharpness we mean the shrinking of the distribution relative to the prior acceptable range toward a posterior distribution with a well-defined, narrow peak). Sharp distributions with small posterior ranges relative to the prior ones indicate sensitive parameters. This means that the model posterior probability (i.e. model plausibility) increased significantly with the specific values of the selected parameters retained by the MCMC sampling. The slightly bimodal structures of the

posterior distributions of Vmax, Vb and Vip were likely a consequence of their significant cross-correlations (Table S1). However, the posterior distributions of these three parameters were robust and consistent even when the Bayesian optimization was executed on independent periods (Fig. S5)."

Comment 20

Conclusions:

20. General remarks on Section 4: some of the points are speculative (e.g. p 12, l. 24-26; paragraph starting at l. 30); these belong in Discussion rather than Conclusions (see note 17, last sentence).

Response

We moved the indicated paragraph in the discussion.

Comment 21

22. Is MAIDEN publicly available (it was first introduced in 2004), and if not, could it be made so, to encourage experimentation in other environments, species, applications? This would be a great contribution and it would be consistent with the open data access policies of CP.

General comment

publication of MAIDEN code in the public domain such that others may experiment with this well-studied and highly valuable model

Response

The used MAIDEN version will be made publicly available upon the paper acceptance on "Figshare". The DOI will be updated at the next step of the reviewing process.

P 13 L 26 "The used MAIDEN version is publicly available on "Figshare": DOI: to be obtained."

Comment 22

23. Fig S12: this is not isoMAIDEN as in the caption, correct?

Response

We corrected our mistake.

Comment 23

24. Trivia: for future revisions if necessary, make line numbers cumulative rather than by page

Response

We used the Copernicus "Word" template.

Comment 24

25. Trivia: p. 9, l. 30: "...is sensitive to all..."

Response

We corrected the mistake.

Comment 25

26. Trivia: Slight revisions for English grammar and usage: pg 3 l. 3-5; please go through entire manuscript to revise for grammar as well.

Response

We revised the sentence:

P 3 L 2 "This comparison allows to verify that the process-based ecophysiological model satisfactorily reproduces the variability of the observed data and that its simulations keep robust relationships with the most significant climate variables."

#####

Reviewer #2:

Comment 1

1. Page3 last paragraph: About parameter tuning, there are 6 (reference: daily GPP) + 12 (reference: annual ring width) parameters tuned in this application. It is very smart of using Bayesian optimization for such a large number of parameters tuning. However, there are only 2 references (GPP and detrended tree ring). This might have impact on the final choice of the parameter value. Some solid check about the relationship among different parameters (correlation or interaction), and sensitivity analysis for Dstem parameters is needed.

Response

We added a cross-correlation analysis of the parameters' values (Tables S1 and S2; see also discussion of these tables in the main text), a sensitivity analysis of some central Dstem parameters (Figs. 7, 8 and S20), and a cross-validation of parameters' distributions (Figs. S5, S9 and S10; see also discussion in the main text).

Comment 2

2. Page 7 line 18: Typo "Ring with" should be "Ring width"

Response

We corrected the mistake.

Comment 3

3. Page 8 line 5: The input data for MAIDEN include daily temperature and precipitation, as well as CO<sub>2</sub>. Is the solar-related parameter needed, e.g. sunshine hour, cloud cover fraction? If not, please briefly demonstrate how photosynthesis was estimated.

Response

MAIDEN can use two different meteorological input data: (1) a complete dataset composed of daily temperature, precipitation, CO<sub>2</sub>, radiation, relative humidity and wind speed; (2) a reduced dataset composed of daily temperature, precipitation and CO<sub>2</sub>. We used MAIDEN with the reduced input data and letting the model estimate the other variables as explained by Misson (2004).

In the case of radiation, Misson (2004) explains:

"Climatic driving variables are daily minimum and maximum temperatures, precipitation, global radiation, and atmospheric vapor pressure deficit (Table 1). Since radiation and humidity variables are usually not available for large temporal and spatial scale applications, we coupled the MT-CLIM model (Running et al. 1987) to MAIDEN to estimate these variables from observations of daily maximum and minimum temperatures and precipitation. In MT-CLIM, humidity estimates are based on the fact that daily minimum temperature is usually very close to the dew point (Running et al. 1987). Radiation estimates are based on the fact that the diurnal temperature range is closely related to the daily mean atmospheric transmittance (Running et al. 1987; Thornton et al. 2000)."

We modified our text to better clarify the input data required by MAIDEN while we refer to Misson (2004) for a more in detail description of the estimation of the micrometeorological covariates:

P 3 L 8 "Starting from daily minimum-maximum air temperature, precipitation and CO<sub>2</sub> atmospheric concentration (these are the minimum required input variables which are completed by radiation, relative humidity and wind speed when additional meteorological data are available; Misson, 2004), MAIDEN models the phenological and meteorological controls on GPP and carbon allocation (Fig. 1; see also flowcharts in Misson, 2004 and Gea-Izquierdo et al., 2015)."

The MAIDEN code will also be freely available upon the paper acceptance and the readers can directly verify on the code the used equations. The DOI will be updated at the next step of the reviewing process.

P 13 L 25 "The used MAIDEN version is publicly available on "Figshare": DOI: to be obtained."

Running, S. W., Nemani, R. R., and Hungerford, R. D.: Extrapolation of synoptic meteorological data in mountainous terrain and its use for simulating forest evapotranspiration and photosynthesis, *Can. J. Forest Res.*, 17, 472-483, doi:10.1139/x87-081, 1987.

Thornton, P. E., Hasenauer, H., and White, M. A.: Simultaneous estimation of daily solar radiation and humidity from observed temperature and precipitation: an application over complex terrain in Austria, *Agr. Forest Meteorol.*, 104, 255-271, doi:https://doi.org/10.1016/S0168-1923(00)00170-2, 2000.

#### Comment 4

4. Page 8 last paragraph: In the third step of this research (evaluation of the model performance), the indirect comparison between variance explanation (R<sup>2</sup>) of model simulation and climate response function was applied. It would be helpful to verify the model performance by showing the same climate response function analysis for the model simulation, e.g. combined Table 2 and 3 for the both observed and simulated GPP and Dstem. And it would be even more convincing to show the moving correlation analysis (figure 6) between simulated Dstem and monthly climate.

12. Figure 6: Is it possible to add the same moving correlation for simulated Dstem?

#### Response

We modified the figure (Fig. 4) as suggested, showing the moving correlations for simulated Dstem.

#### Comment 5

5. Page 9 line 3: R<sup>2</sup> was widely used in this model-data comparison. a) The calculation method for R<sup>2</sup> is needed here. b) Was model (parameter) was tuned using the same whole observation, or only a portion of the observation? A bit curious about the not small negative value of R<sup>2</sup>.

10. Figure 4: The method of calculating R<sup>2</sup> need to be specified, either in the method part or the figure caption part. Is there any constraint when R<sup>2</sup> was calculated, especially for the negative R<sup>2</sup>?

#### Response

A cross-validation of parameters' distributions can be found on Figs. S5, S9 and S10 (see also discussion in the main text).

We added the R<sup>2</sup> computation method.

P 7 L 5 "The proportion of the observed variability explained by MAIDEN was evaluated with the coefficient of determination (R<sup>2</sup>), which compares the performance of simulated time series relative to that of straight horizontal lines centered on the data:

$$R^2 = 1 - \frac{\sum_i (Obs_i - Sim_i)^2}{\sum_i (Obs_i - \overline{Obs})^2}$$

#### Comment 6

6. Page 9 line 15: It makes sense that the annual GPP has a very poor correlation with ring width. One of the obvious reason is the definition of "annual" and the carbon carry over from previous year, which is the stored carbon in MAIDEN. I guess "annual" in the paper means the calendar year (Jan to Dec). It would be very useful to check the correlation between GPP in effective carbon year (or growth year, e.g. previous July to current June or from previous Phase 4 to Phase 3) and ring width observation.

#### Response

We checked the reviewer suggestion and produced a new figure (Fig. S6).



Comment 7

7. Page 12 line 23: Does increasing CO<sub>2</sub> contributed to this positive relation between summer temperature and Dstem? Is there any CO<sub>2</sub> fertilisation signal in both the simulated Dstem and the observed ring width?

Response

We added Figure S11 and some text.

P 9 L 17 “Indeed, the positive trend in response to the warming of the last few decades was well captured by the model simulations of stem increments, which included some CO<sub>2</sub> fertilization contribution (Fig. S11).”

Comment 8

8. Page 11 line 1: Does this stored carbon include previous year's stored carbon? What would happen, if the stored carbon was used up, e.g. carbon was stored very little during previous year?

Response

Yes, the stored carbon include previous year's stored carbon. If no stored carbon is used in the budburst phase the correlations between Dstem and RWhighF drop down (Fig. S20). We modified some text accordingly:

P 10 L 33 “In phase 3, corresponding to Budburst, a portion of the available carbon simulated by MAIDEN comes from stored non-structural carbohydrates from the current and previous years (parameter Cbud; see Table 1). In our case, Cbud was quantified as about 1.69 g C•m<sup>-2</sup> day<sup>-1</sup> (Fig. S8f) and this remobilization improves the correlations between Dstem and RWhighF (Fig. S20). However, the Cbud selection was also sensitive to the period and the site used in the optimization (Figs. S9 and S10).”

Comment 9

9. Page2 line 5: “compartments” mean “component”?

Response

We replaced “compartments” by “component”.

Comment 10

11. Figure 5: Please enlarge the scatter plot for both the Daily GPP and the Annual GPP

Response

We did the modification.

Comment 11

13. Figure 7: Please enlarge the scatter plot for both the detrended and raw Dstem.

Response

We did the modification.

Comment 12

14. Figure 9: The information about the colour scale is needed in the caption.

Response

We added in the caption (Fig. 7) the requested information: “unitless multiplier”

Comment 13

15. Table 1: It would be good to add the prior range in this table

Response

We added the prior range

#####

#### Interactive comment #1:

##### Comment 1

Title: Maybe it would make sense to remove “the climate imprint” and “North America” from the title: Ecophysiological modeling of photosynthesis and carbon allocation to the tree stem in the boreal forest. With this the title still informs about the content of the article: modeling of photosynthesis and carbon allocation and the link to tree stem growth, and as hinted in the article, the model can also be applied to other boreal forests outside of North America ! attract more readers with the article?

##### Response

We agree with this suggestion and modified the title.

##### Comment 2

Material and Methods: Overall well explained but tricky to get it straight. There are many factors and parts of the model explained but it would be helpful to have some kind of flowchart that explains in which order the model runs (see e.g. fig. 1 in Gea- Izquierdo et al., 2015 or Misson, 2004).

Figure 1: This figure is not optimal, although in its core it explains the MAIDEN model, text and visualization do not support each other and partly the text is not even clearly readable:

##### Response

We referred to the already published flowcharts and increased readability of Figure 1 reducing box transparency.

P 3 L 11 “(Fig. 1; see also flowcharts in Misson, 2004 and Gea-Izquierdo et al., 2015)”

##### Comment 3

Table 1: This table displays a significant amount of the authors work but has no real description.

##### Response

We added a more complete description.

##### Comment 4

One could argue that some parts in this chapter could be moved into the supplements: For extended reasoning to why something was done in whichever way: e.g. page 4, line 23 to 31 or page 5 lines 15 and 16, or page 7 sections 2.2.1 and 2.2.2.

This chapter is too long (especially compared to the discussion which is only half the size), having read this part, a reader must make a break or will lose attention during the next sections.

##### Response

We reduced several sections of our Materials and Methods and moved the information in the Supplement S2.

##### Comment 5

Figure 2 is not really adding something to the paper. Why no move into supplement?

##### Response

We moved Figs. 2 and 3 in the supplements (Figs. S2 and S3)

##### Comment 6

Chapter 2.2.3 Climate Data: Even though a considerable amount of work was put into acquiring climate data one might consider putting some part of this chapter into the supplements. This refers to the sentence ranging from line 9 to 13. It is an exhaustive sentence and could profit from a more detailed explanation within the supplements.

Response

We reduced the chapter and moved some information in the Supplement S2.

**Comment 7**

**Results and Discussion:** This part is – although to a lesser extent – still massive. It is quite difficult to find key aspects and concepts within the text. It would be nice to have a table (similar to Table 1), or bullet points or another form of highlighting of the key findings.

Response

Key findings are already highlighted by the figures:

Figs. 2 to 5 = Performance of MAIDEN in reproducing observed data

Figs. 6 to 8 = Impact of key model adaptations on the simulations and on the correspondence with observed data.

**Comment 8**

**Figure 6:** Is the indication “-1” really necessary when the title already states “previous year”?

Response

We deleted “-1” (Fig. 4).

**Comment 9**

**Conclusion:** Well written but also a bit too much text, one could remove lines 26 to 29 (page 12), (an interested researcher can always contact the authors for advice/guidance).

Response

We removed these lines.
